# Supplementary material for: Looking for Local Adaptation: Convergent Microevolution in Aleppo Pine (Pinus halepensis)
Source: PubMed Central journal article supplement (PMC6771008; doi:10.3390/genes10090673), 2019-09-04
Supplement: genes-10-00673-s001.pdf [file genes-10-00673-s001.pdf]

1 **Supporting Information**

2 **Table S1:** sampling details of the seven populations.

3

| Country | Plot               | Coordinates |            | Sampling size |
|---------|--------------------|-------------|------------|---------------|
|         |                    | Latitude    | Longitude  |               |
| France  | Saint Mitre        | 43.4518140  | 5.0419330  | 50            |
| France  | Font Blanche       | 43.2407610  | 5.6791030  | 256           |
| France  | Siou Blanc         | 43.2375560  | 5.8875000  | 50            |
| Italy   | Mattinata          | 41.6949892  | 16.0589908 | 25            |
| Italy   | Monte Sant' Angelo | 41.6949104  | 16.0216220 | 25            |
| Spain   | Alzira             | 39.1223287  | -0.3892886 | 39            |
| Spain   | Montan             | 40.0472534  | -0.5925626 | 31            |

4

5 **Table S2:** environmental variables retrieved from WORDLCLIM for the seven populations.

6

| <b>Population</b>  | <b>altitude</b> | <b>BIO 1</b> | <b>BIO 2</b> | <b>BIO 3</b> | <b>BIO 4</b> | <b>BIO 5</b> | <b>BIO 6</b> | <b>BIO 7</b> | <b>BIO 8</b> | <b>BIO 9</b> | <b>BIO 10</b> | <b>BIO 11</b> | <b>BIO 12</b> | <b>BIO 13</b> | <b>BIO 14</b> | <b>BIO 15</b> | <b>BIO 16</b> | <b>BIO 17</b> | <b>BIO 18</b> | <b>BIO 19</b> |
|--------------------|-----------------|--------------|--------------|--------------|--------------|--------------|--------------|--------------|--------------|--------------|---------------|---------------|---------------|---------------|---------------|---------------|---------------|---------------|---------------|---------------|
| Font Blanche       | 408             | 126          | 83           | 34           | 5505         | 257          | 17           | 240          | 97           | 198          | 198           | 58            | 711           | 90            | 17            | 33            | 253           | 94            | 94            | 206           |
| Siou Blanc         | 614             | 116          | 80           | 34           | 5419         | 245          | 10           | 235          | 89           | 187          | 187           | 50            | 777           | 94            | 20            | 32            | 273           | 107           | 107           | 226           |
| St Mitre           | 138             | 134          | 96           | 36           | 5885         | 279          | 13           | 266          | 142          | 210          | 210           | 59            | 614           | 85            | 18            | 33            | 220           | 89            | 89            | 164           |
| Monte Sant' Angelo | 462             | 135          | 69           | 29           | 5958         | 265          | 33           | 232          | 108          | 214          | 214           | 65            | 535           | 63            | 29            | 25            | 180           | 93            | 93            | 156           |
| Mattinata          | 79              | 160          | 76           | 32           | 5783         | 289          | 55           | 234          | 135          | 235          | 235           | 90            | 465           | 60            | 20            | 35            | 173           | 69            | 69            | 143           |
| Montan             | 848             | 123          | 94           | 36           | 5878         | 265          | 10           | 255          | 132          | 54           | 202           | 54            | 490           | 59            | 23            | 29            | 158           | 93            | 106           | 93            |
| Alzira             | 112             | 173          | 97           | 40           | 5197         | 301          | 60           | 241          | 187          | 239          | 243           | 109           | 466           | 81            | 9             | 48            | 191           | 50            | 80            | 120           |

7

8

9

10 **Table S3:** list of bioclimatic variables BIO1-BIO19 available in WORDLCLIM.

11

| <b>Name</b> | <b>Description</b>                                         |
|-------------|------------------------------------------------------------|
| BIO1        | Annual Mean Temperature                                    |
| BIO2        | Mean Diurnal Range (Mean of monthly (max temp - min temp)) |
| BIO3        | Isothermality (BIO2/BIO7) (* 100)                          |
| BIO4        | Temperature Seasonality (standard deviation *100)          |
| BIO5        | Max Temperature of Warmest Month                           |
| BIO6        | Min Temperature of Coldest Month                           |
| BIO7        | Temperature Annual Range (BIO5-BIO6)                       |
| BIO8        | Mean Temperature of Wettest Quarter                        |
| BIO9        | Mean Temperature of Driest Quarter                         |
| BIO10       | Mean Temperature of Warmest Quarter                        |
| BIO11       | Mean Temperature of Coldest Quarter                        |
| BIO12       | Annual Precipitation                                       |
| BIO13       | Precipitation of Wettest Month                             |
| BIO14       | Precipitation of Driest Month                              |
| BIO15       | Precipitation Seasonality (Coefficient of Variation)       |
| BIO16       | Precipitation of Wettest Quarter                           |
| BIO17       | Precipitation of Driest Quarter                            |
| BIO18       | Precipitation of Warmest Quarter                           |
| BIO19       | Precipitation of Coldest Quarter                           |

12

13 **Table S4:** pairwise  $F_{ST}$  between the seven populations from France, Italy and Spain. Significant difference (p-val <0.5) among population pairs  
 14 are indicated with an asterisk.

15

|                    | France       |            |             | Spain   |         | Italy              |           |
|--------------------|--------------|------------|-------------|---------|---------|--------------------|-----------|
|                    | Font Blanche | Siou Blanc | Saint Mitre | Montan  | Alzira  | Monte Sant' Angelo | Mattinata |
| Font Blanche       | 0            | 0.0121*    | 0.0049*     | 0.0853* | 0.0999* | 0.3082*            | 0.3073*   |
| Siou Blanc         |              | 0          | 0.0138*     | 0.1056* | 0.1210* | 0.3124*            | 0.3115*   |
| Saint Mitre        |              |            | 0           | 0.0861* | 0.0990* | 0.3254*            | 0.3232*   |
| Montan             |              |            |             | 0       | 0.0151* | 0.2978*            | 0.2877*   |
| Alzira             |              |            |             |         | 0       | 0.2760*            | 0.2663*   |
| Monte Sant' Angelo |              |            |             |         |         | 0                  | 0.0122    |
| Mattinata          |              |            |             |         |         |                    | 0         |

16

17

18

19

20 **Table S5:** summary of the results of the Bayesian linear model performed in Bayenv2  
 21 with different bioclimatic variables.

22

| SNP | Sequence            | Bioclimatic variable<br>BF |        |        |
|-----|---------------------|----------------------------|--------|--------|
| 169 | seq-0_10162_01-244  | altitude                   | BIO9   |        |
|     |                     | 20.903                     | 41.971 |        |
| 312 | seq-UMN_3408_01-293 | BIO2                       |        |        |
|     |                     | 20.853                     |        |        |
| 316 | seq-10373-2483      | BIO2                       | BIO19  |        |
|     |                     | 20.505                     | 53.894 |        |
| 378 | seq-2_3941_01-381   | BIO12                      | BIO16  | BIO19  |
|     |                     | 47.378                     | 64.627 | 71.261 |

23  
 24  
 25

26 **Table S6:** summary of the results of the Bayesian linear model performed in Baypass  
 27 with different bioclimatic variables (Env.).

28

| SNP | Sequence                | Env      | M-pearson  | SD_Pearson | eBPis      |
|-----|-------------------------|----------|------------|------------|------------|
| 2   | seq-6890-2409           | BIO3     | -0.5733702 | 0.23280148 | 3.11399102 |
| 4   | seq-9882-801            | BIO12    | -0.5251087 | 0.1238397  | 5.37596943 |
| 7   | seq-7270-1484           | BIO2     | -0.8051462 | 0.11801382 | 4.14633727 |
| 7   | seq-7270-1484           | BIO7     | -0.7214707 | 0.1499661  | 3.06285797 |
| 7   | seq-7270-1484           | BIO12    | 0.76639455 | 0.08623712 | 4.46058182 |
| 7   | seq-7270-1484           | BIO16    | 0.72976022 | 0.13401115 | 3.03150769 |
| 7   | seq-7270-1484           | BIO19    | 0.7887976  | 0.11145945 | 3.75236008 |
| 30  | seq-9243-371            | BIO12    | 0.64362547 | 0.14199203 | 5.24558596 |
| 30  | seq-9243-371            | BIO16    | 0.59596188 | 0.1386626  | 3.71530188 |
| 30  | seq-9243-371            | BIO19    | 0.58877171 | 0.14257403 | 3.97485605 |
| 148 | seq-0_12216_02-537      | BIO12    | -0.7620282 | 0.15270792 | 4.15829304 |
| 148 | seq-0_12216_02-537      | BIO19    | -0.7102334 | 0.16325765 | 3.07555576 |
| 151 | seq-0_8992_01-119       | BIO12    | 0.65511587 | 0.19022025 | 3.07242975 |
| 169 | seq-0_10162_01-244      | Altitude | 0.76153998 | 0.13068642 | 3.76859495 |
| 169 | seq-0_10162_01-244      | BIO1     | -0.6542224 | 0.14417419 | 3.09435782 |
| 169 | seq-0_10162_01-244      | BIO9     | -0.8379422 | 0.08956155 | 5.48337617 |
| 169 | seq-0_10162_01-244      | BIO11    | -0.6239025 | 0.14530298 | 3.00001402 |
| 169 | seq-0_10162_01-244      | BIO13    | -0.7137226 | 0.12101459 | 5.19887839 |
| 169 | seq-0_10162_01-244      | BIO15    | -0.6434817 | 0.15061643 | 3.08844092 |
| 182 | seq-0_16860_01-314      | Dry/Wet  | 0.8022037  | 0.14918111 | 3.00958542 |
| 205 | seq-CL708CONTIG1_02-173 | BIO12    | -0.762647  | 0.17323487 | 3.24830529 |
| 258 | seq-9882-2209           | Altitude | 0.47978421 | 0.14401977 | 5.0545209  |
| 258 | seq-9882-2209           | BIO12    | -0.5801209 | 0.11965805 | 6.33377503 |
| 258 | seq-9882-2209           | BIO19    | -0.4719654 | 0.14022928 | 3.01268994 |
| 269 | seq-16094-1379          | BIO12    | 0.6201313  | 0.13851844 | 4.85579828 |
| 269 | seq-16094-1379          | BIO16    | 0.63737081 | 0.13333415 | 3.77450901 |
| 269 | seq-16094-1379          | BIO19    | 0.67220926 | 0.12747789 | 4.72441191 |

|     |                   |          |            |            |            |
|-----|-------------------|----------|------------|------------|------------|
| 281 | seq-16094-410     | Altitude | -0.447868  | 0.16543734 | 3.2116434  |
| 281 | seq-16094-410     | BIO12    | 0.58038238 | 0.135169   | 5.20973055 |
| 281 | seq-16094-410     | BIO12    | 0.57368845 | 0.13367159 | 3.02821708 |
| 281 | seq-16094-410     | BIO16    | 0.64456484 | 0.12215464 | 4.64057127 |
| 281 | seq-16094-410     | BIO19    | 0.63426007 | 0.12530935 | 4.91602902 |
| 316 | seq-10373-2483    | Altitude | -0.5209439 | 0.13402176 | 4.36836379 |
| 316 | seq-10373-2483    | BIO12    | -0.525043  | 0.13970482 | 3.71427816 |
| 316 | seq-10373-2483    | BIO12    | 0.67126778 | 0.10078796 | 6.71104438 |
| 316 | seq-10373-2483    | BIO16    | 0.58991637 | 0.1342952  | 3.57113029 |
| 316 | seq-10373-2483    | BIO19    | 0.67505682 | 0.1205309  | 5.17564163 |
| 325 | seq-8188-285      | Altitude | -0.5498621 | 0.2263624  | 3.03248511 |
| 325 | seq-8188-285      | BIO12    | 0.75402557 | 0.16680693 | 3.51109846 |
| 337 | seq-36858-735     | BIO10    | 0.56181138 | 0.15827186 | 3.08795106 |
| 337 | seq-36858-735     | BIO12    | -0.6011001 | 0.17039471 | 3.3155499  |
| 364 | seq-2_2937_01-309 | BIO2     | -0.8005791 | 0.12499065 | 4.36356318 |
| 364 | seq-2_2937_01-309 | BIO7     | -0.6979643 | 0.15040826 | 3.26117794 |
| 364 | seq-2_2937_01-309 | BIO12    | 0.76465655 | 0.0946094  | 4.85192671 |
| 364 | seq-2_2937_01-309 | BIO16    | 0.70987328 | 0.14077677 | 3.14422469 |
| 364 | seq-2_2937_01-309 | BIO19    | 0.76967958 | 0.11920607 | 4.04043984 |
| 378 | seq-2_3941_01-381 | BIO12    | 0.51160742 | 0.15811359 | 3.65435041 |

29

30

31

32

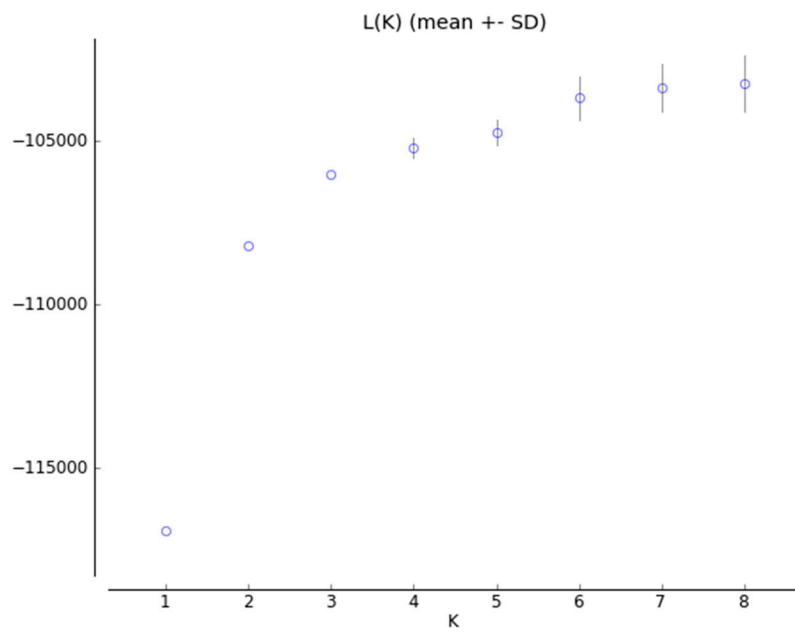

33

34

35 **Figure S1:** Likelihood of  $K$  (averaged across all six iterations) for each value of  $K$  (1 to  
36 8) estimated in STRUCTURE.



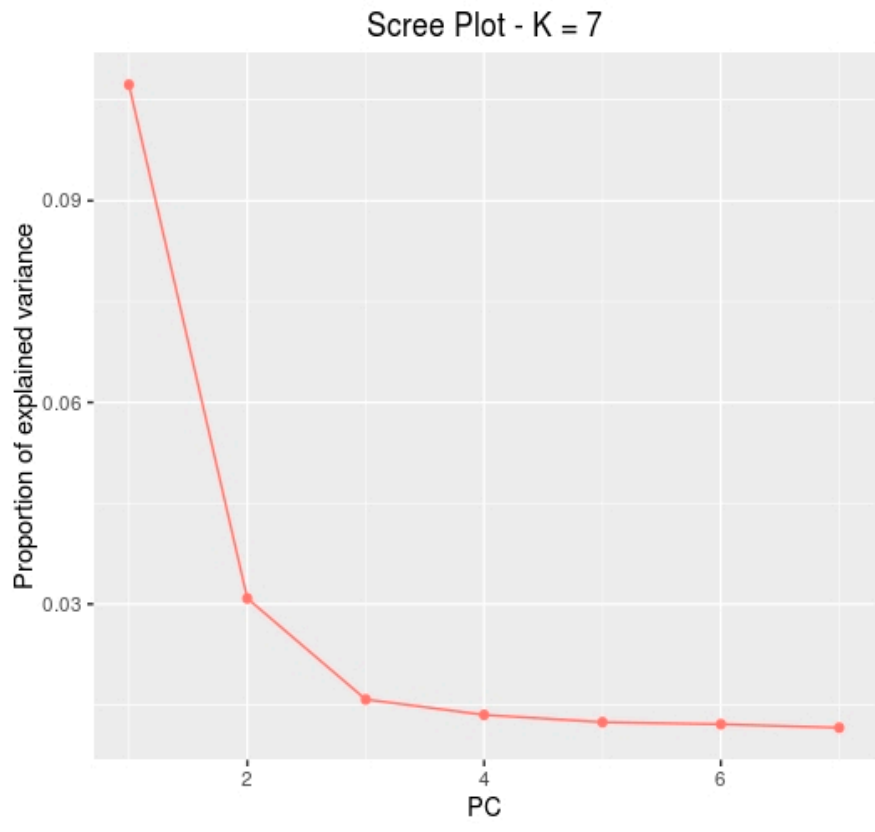

37

38 **Figure S2:** Scree plot that displays, in decreasing order, the percentage of variance  
39 explained by each PC. These correspond to the eigenvalues in decreasing order.

40

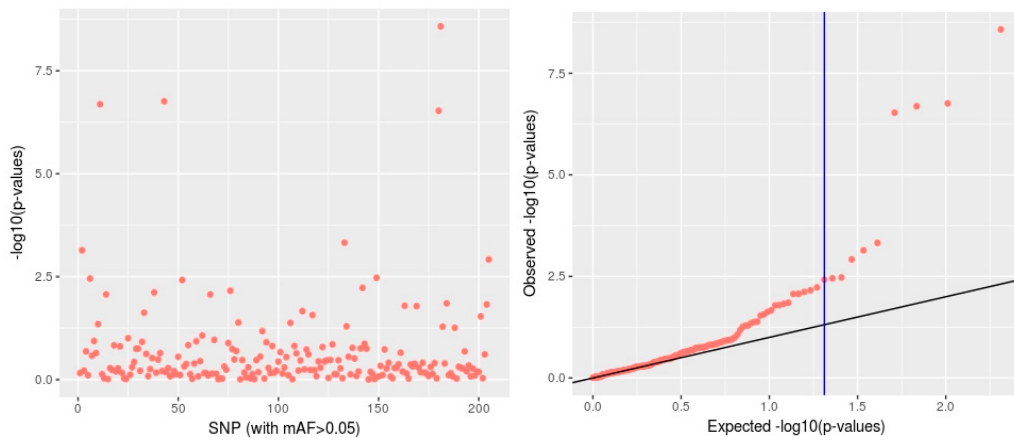

41

42

43 **Figure S3:** Distribution of the empirical p-values obtained by PCAdapt visualized  
44 through a Manhattan plot (left) and a QQ-plot (right) showing the cut off of 0.1%  
45 (vertical blue line).

46

47

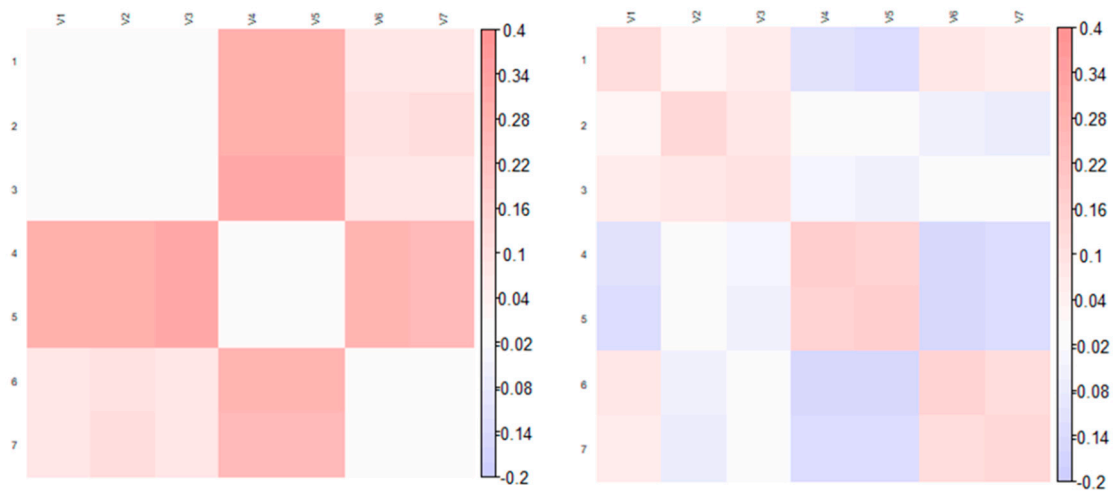

48

49

50

51 **Figure S4:** Heatmaps of the pairwise  $F_{ST}$  distance (left) and the covariance matrix  
52 calculated in Bayenv2 (right). Number corresponds to the following populations; 1:  
53 Font Blanche (France), 2: Siou Blanc (France), 3: Saint Mitre (France), 4: Monte Sant'  
54 Angelo (Italy), 5: Mattinata (Italy), 6: Montan (Spain) and 7: Alzira (Spain).

55

56

57

58

59

60

61

62

63

64

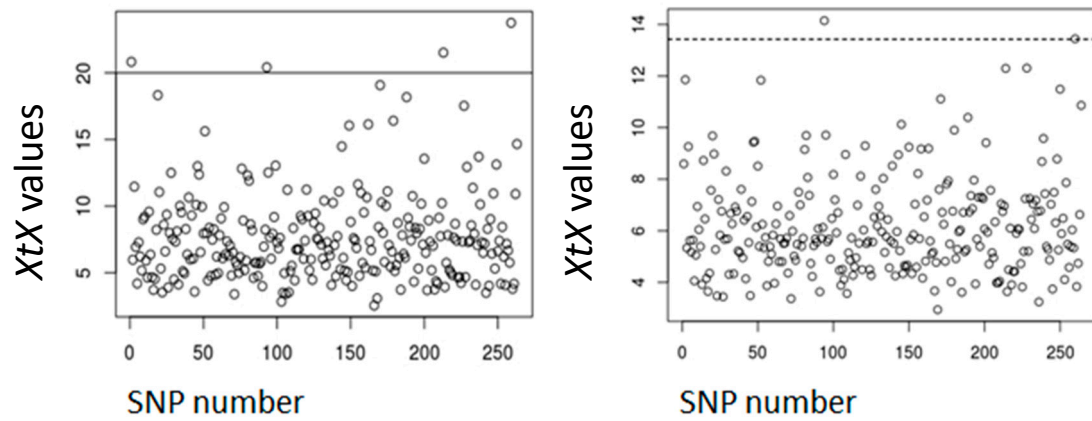

65 **Figure S5:** The  $XtX$ s estimated from Bayenv2 (left) with a threshold based on a cut off  
66 from the distribution (horizontal dark line) and from Baypass (right) showing the 0.01  
67 per cent cut off threshold (horizontal dotted line) computed using the POD data.

68

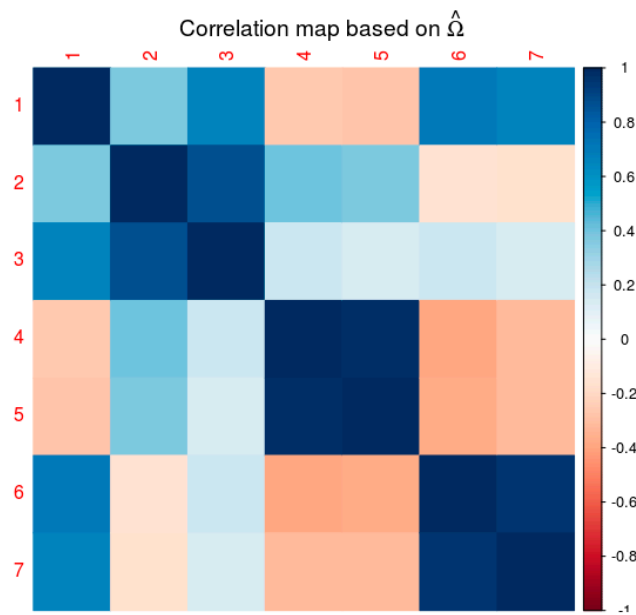

69

70

71 **Figure S6:** A correlation matrix comparing the  $\hat{\Omega}$  values amongst the populations of the  
72 SNP data set computed in Baypass. Numbers correspond to the following populations;  
73 1: Font Blanche (France), 2: Siou Blanc (France), 3: Saint Mitre (France), 4: Monte  
74 Sant' Angelo (Italy), 5: Mattinata (Italy), 6: Montan (Spain) and 7: Alzira (Spain).

75

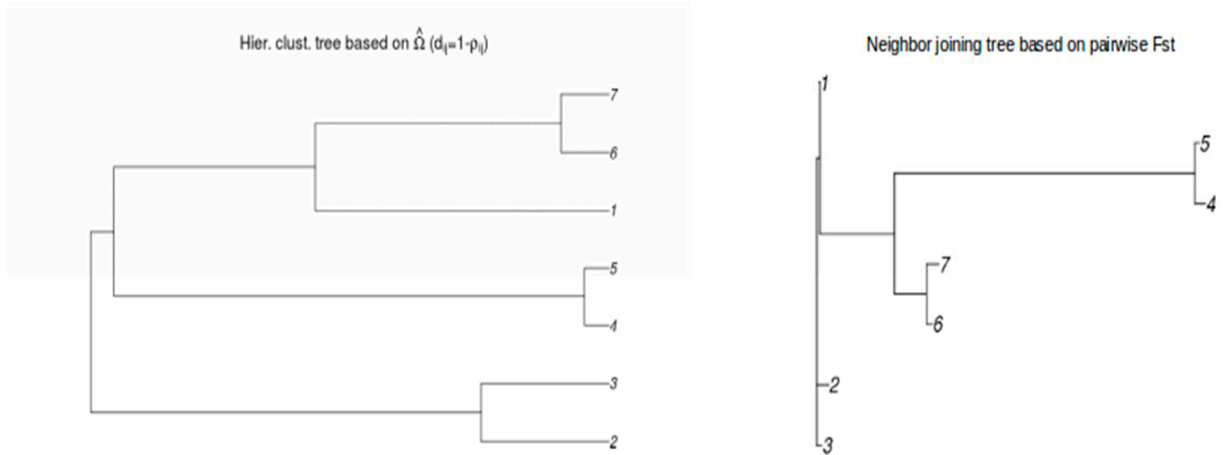

76

77 **Figure S7:** The correlation matrix visualised as a hierarchical cluster tree where the  
78 relationships between populations can be appreciated (left) compared to a neighbour  
79 joining (right) tree of pairwise  $F_{ST}$ . Number corresponds to the following populations; 1:  
80 Font Blanche (France), 2: Siou Blanc (France), 3: Saint Mitre (France), 4: Monte Sant'  
81 Angelo (Italy), 5: Mattinata (Italy), 6: Montan (Spain) and 7: Alzira (Spain).
